# Supplementary material for: Evolutionary Origin, Genetic Recombination, and Phylogeography of Porcine Kobuvirus
Source: MDPI journal article supplement (doi:10.3390/v15010240), 2023-01-14
Supplement: s1 [file s1]

**Table S1** Referenced PCV3 strains used in phylogenetic analysis

| No. | GenBank Accession No. | Data (Year/Month/Day) | Region  | Host    |
|-----|-----------------------|-----------------------|---------|---------|
| 1   | AH32                  | 2016.07.13            | China   | Porcine |
| 2   | AH42                  | 2016.07.13            | China   | Porcine |
| 3   | AH49                  | 2016.07.13            | China   | Porcine |
| 4   | AH75                  | 2016.07.13            | China   | Porcine |
| 5   | JN630514              | 2010.12.15            | China   | Porcine |
| 6   | JQ692069              | 2011.06.15            | China   | Porcine |
| 7   | JX401523              | 2012.04.15            | China   | Porcine |
| 8   | KC204684              | 2011.06.30            | China   | Porcine |
| 9   | KC414936              | 2012.08.15            | China   | Porcine |
| 10  | KC424638              | 2012.08.15            | China   | Porcine |
| 11  | KF539763              | 2012.06.15            | China   | Porcine |
| 12  | KF695124              | 2008.12.05            | China   | Porcine |
| 13  | KJ452348              | 2012.06.30            | China   | Porcine |
| 14  | KM051987              | 2014.03.15            | China   | Porcine |
| 15  | KP144318              | 2013.06.30            | China   | Porcine |
| 16  | KP260507              | 2014.12.10            | China   | Porcine |
| 17  | KY234499              | 2015.06.30            | China   | Porcine |
| 18  | KY234500              | 2015.06.30            | China   | Porcine |
| 19  | MG800803              | 2015.09.15            | China   | Porcine |
| 20  | MG800804              | 2015.09.15            | China   | Porcine |
| 21  | MG800805              | 2015.09.15            | China   | Porcine |
| 22  | MG800806              | 2015.09.15            | China   | Porcine |
| 23  | MG800807              | 2015.09.15            | China   | Porcine |
| 24  | MT125683              | 2013.12.15            | China   | Porcine |
| 25  | MT125684              | 2013.12.15            | China   | Porcine |
| 26  | MT125685              | 2018.09.09            | China   | Porcine |
| 27  | NC016769              | 2010.12.15            | China   | Porcine |
| 28  | NC027054              | 2014.12.10            | Spain   | Porcine |
| 29  | MK962321              | 2017.07.04            | Spain   | Porcine |
| 30  | MK962322              | 2017.03.16            | Spain   | Porcine |
| 31  | MK962324              | 2017.09.18            | Spain   | Porcine |
| 32  | MK962327              | 2017.05.24            | Spain   | Porcine |
| 33  | MK962328              | 2017.06.01            | Spain   | Porcine |
| 34  | MK962329              | 2017.11.01            | Spain   | Porcine |
| 35  | MK962330              | 2017.09.22            | Spain   | Porcine |
| 36  | MK962331              | 2017.05.30            | Spain   | Porcine |
| 37  | MK962332              | 2017.07.14            | Spain   | Porcine |
| 38  | MK962333              | 2017.11.02            | Spain   | Porcine |
| 39  | MK962334              | 2017.02.14            | Spain   | Porcine |
| 40  | MK962335              | 2017.01.25            | Spain   | Porcine |
| 41  | MK962336              | 2017.01.25            | Spain   | Porcine |
| 42  | LT898428              | 2014.02.14            | Germany | Porcine |

|    |          |            |                |         |
|----|----------|------------|----------------|---------|
| 43 | JX177612 | 2011.04.15 | Hungary        | Porcine |
| 44 | MN807751 | 2013.01.15 | Hungary        | Porcine |
| 45 | LC210599 | 2014.01.08 | Japan          | Porcine |
| 46 | LC210600 | 2014.01.08 | Japan          | Porcine |
| 47 | LC210601 | 2014.01.08 | Japan          | Porcine |
| 48 | LC210602 | 2014.01.08 | Japan          | Porcine |
| 49 | LC210603 | 2014.01.08 | Japan          | Porcine |
| 50 | LC210604 | 2014.01.09 | Japan          | Porcine |
| 51 | LC210605 | 2014.01.10 | Japan          | Porcine |
| 52 | LC210606 | 2014.01.10 | Japan          | Porcine |
| 53 | LC210607 | 2014.01.10 | Japan          | Porcine |
| 54 | LC210608 | 2014.01.14 | Japan          | Porcine |
| 55 | LC210609 | 2014.01.23 | Japan          | Porcine |
| 56 | LC210610 | 2014.01.29 | Japan          | Porcine |
| 57 | LC210611 | 2014.02.06 | Japan          | Porcine |
| 58 | LC210612 | 2015.12.06 | Japan          | Porcine |
| 59 | LC210613 | 2016.01.20 | Japan          | Porcine |
| 60 | LC210614 | 2015.11.06 | Japan          | Porcine |
| 61 | LC210615 | 2015.11.06 | Japan          | Porcine |
| 62 | LC210616 | 2015.11.05 | Japan          | Porcine |
| 63 | LC210617 | 2015.11.04 | Japan          | Porcine |
| 64 | LC210619 | 2015.11.09 | Japan          | Porcine |
| 65 | LC210620 | 2015.11.27 | Japan          | Porcine |
| 66 | LC210621 | 2014.04.13 | Japan          | Porcine |
| 67 | LC210622 | 2014.12.14 | Japan          | Porcine |
| 68 | MT211964 | 2018.01.18 | Mexico         | Porcine |
| 69 | MZ334483 | 2018.06.30 | Netherland     | Porcine |
| 70 | KM977675 | 2011.06.15 | America        | Porcine |
| 71 | MF506730 | 2011.04.13 | America        | Porcine |
| 72 | OM105002 | 2021.03.15 | South Africa   | Porcine |
| 73 | MT766372 | 2018.08.12 | China          | Sewage  |
| 74 | MW296158 | 2019.01.01 | China          | Sheep   |
| 75 | GU245693 | 2009.06.30 | Hungary        | Sheep   |
| 76 | NC026314 | 2011.01.15 | Germany        | Human   |
| 77 | AB010145 | 1998.01.07 | Japan          | Human   |
| 78 | AB040749 | 2000.03.27 | Japan          | Human   |
| 79 | JX564249 | 2010.06.30 | China          | Human   |
| 80 | GQ927711 | 2004.06.30 | Germany        | Human   |
| 81 | AY747174 | 2004.09.10 | Germany        | Human   |
| 82 | MF947441 | 2014.05.19 | United Kingdom | Human   |
| 83 | MK372821 | 2015.02.02 | Pakistan       | Human   |
| 84 | MK372823 | 2016.02.09 | Pakistan       | Human   |
| 85 | FJ890523 | 2008.06.30 | China          | Human   |
| 86 | GQ927712 | 2004.06.30 | Germany        | Human   |

|     |          |            |                |        |
|-----|----------|------------|----------------|--------|
| 87  | GQ927704 | 2004.06.30 | Germany        | Human  |
| 88  | MG200054 | 2008.01.15 | Australia      | Human  |
| 89  | GQ927705 | 2004.06.30 | Germany        | Human  |
| 90  | GQ927706 | 2004.06.30 | Germany        | Human  |
| 91  | DQ028632 | 2005.05.04 | Germany        | Human  |
| 92  | MF947442 | 2014.07.16 | United Kingdom | Human  |
| 93  | MF598159 | 2017.06.30 | China          | Feline |
| 94  | KJ958930 | 2012.06.30 | South Korea    | Feline |
| 95  | MK671315 | 2018.06.30 | China          | Feline |
| 96  | MK671314 | 2018.06.30 | China          | Feline |
| 97  | KM091960 | 2013.03.15 | Italy          | Feline |
| 98  | KF831027 | 2011.06.30 | South Korea    | Feline |
| 99  | MN337880 | 2016.04.13 | Germany        | Canine |
| 100 | MN449341 | 2019.04.15 | China          | Canine |
| 101 | MH747478 | 2016.06.30 | Brazil         | Canine |
| 102 | KF924623 | 2012.06.15 | South Korea    | Canine |
| 103 | NC034971 | 2015.09.15 | China          | Canine |
| 104 | KC161964 | 2008.06.30 | United Kingdom | Canine |
| 105 | JQ911763 | 2011.06.30 | China          | Canine |
| 106 | JN088541 | 2010.06.30 | America        | Canine |
| 107 | MW605074 | 2021.12.12 | America        | Bovine |
| 108 | MN336260 | 2019.06.13 | America        | Bovine |
| 109 | KY407744 | 2014.06.30 | Egypt          | Bovine |
| 110 | ON075056 | 2021.06.30 | China          | Bovine |
| 111 | ON075055 | 2021.06.30 | China          | Bovine |
| 112 | ON075054 | 2021.06.30 | China          | Bovine |
| 113 | ON075053 | 2021.06.30 | China          | Bovine |
| 114 | ON075052 | 2021.06.30 | China          | Bovine |
| 115 | ON075051 | 2021.06.30 | China          | Bovine |
| 116 | ON075050 | 2021.06.30 | China          | Bovine |
| 117 | MZ603734 | 2021.07.20 | China          | Bovine |
| 118 | KJ641686 | 2010.10.15 | China          | Bat    |
| 119 | KJ641691 | 2012.12.15 | China          | Bat    |

---
